# Supplementary material for: Synchrotron X-ray diffraction computed tomography to non-destructively study inorganic treatments for stone conservation
Source: PubMed Central journal article supplement — iScience. 2022 Sep 12;25(10):105112. doi: 10.1016/j.isci.2022.105112 (PMC9526187; doi:10.1016/j.isci.2022.105112), 2022-09-12
Supplement: mmc1.pdf [file mmc1.pdf]

**iScience, Volume 25**

**Supplemental information**

**Synchrotron X-ray diffraction computed tomography  
to non-destructively study inorganic  
treatments for stone conservation**

**Elena Possenti, Claudia Conti, G. Diego Gatta, Nicoletta Marinoni, Marco Merlini, Marco Realini, Gavin B.M. Vaughan, and Chiara Colombo**

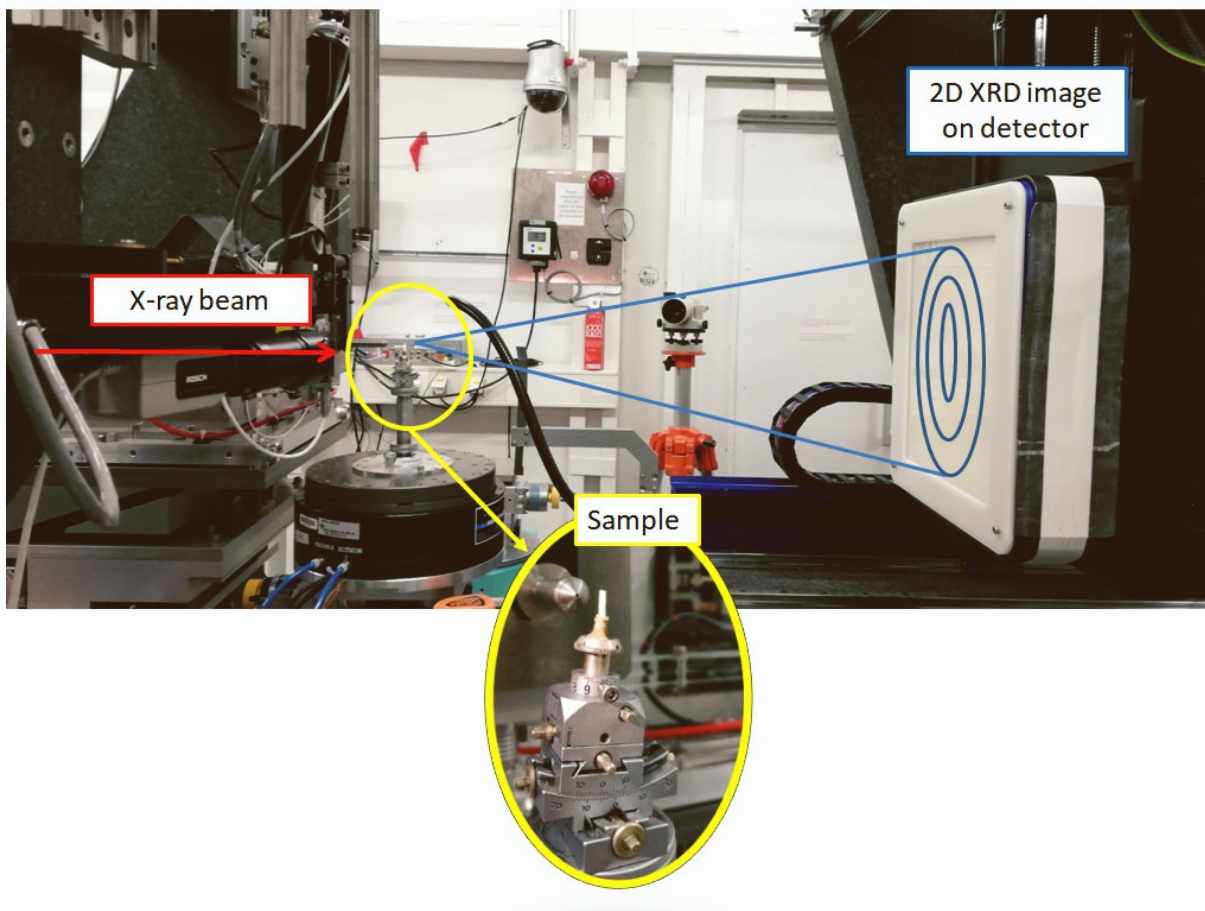

Figure S1. XRDCT experimental setup (ID15a beamline, ESRF) used for the Noto limestone experiment, Related to STAR Methods
